# Supplementary material for: Haplotype-resolved telomere-to-telomere genome assembly of a male Dioscorea alata cultivar provides insights into sex determination mechanism
Source: Research Square preprint supplement (doi:10.21203/rs.3.rs-5627324/v1), 2025-01-14
Supplement: Supplementary file 1 [file 4e6b6191a86efaf060980ca2.xlsx]

## Sheet: Table S1
Table S1: Statistics of the Illumina short reads data
Type	num_seqs	sum_len	GC_content(%)	Q20(%)	Q30(%)
raw data	504,321,070	75,648,160,500	37.20	97.42	91.90
clean data	504,080,122	75,416,766,282	37.17	97.43	91.91

## Sheet: Table S2
Table S2: Statistics of k-mer analysis based on Illumina short reads data
Sample	K-mer	K-mer Number	K-mer Depth	Genome Size (Mb)	Data Size (Gb)	Depth	Heterozygous Ratio (%)	Duplication Ratio (%)
Kabusa	19	52,361,972,385	105.74	494.13	75.42	152.63	1.46	51.05

## Sheet: Table S3
Table S3: Oxford Nanopore Technology ultra-long data statistics
Rank	Flag	TotalBase	TotalReads	MaxLen	AvgLen	N50	L50	N90	L90	meanQ
>0	all	61,359,115,558	5,400,517	574.158	11,361.71	27.779	704.689	5.575	2,476,742	10.14
>0	pass	52,946,148,124	4,440,572	228.305	11,923.27	28.511	596.451	5.895	2,061,321	11.22
>0	fail	8,412,967,434	959.945	574.158	8.764	23.365	110.757	4.122	425.478	5.17
>2000	all	59,579,810,225	3,750,402	574.158	15,886.24	28.613	673.13	7.036	2,221,224	10.24
>2000	pass	51,522,227,124	3,157,755	228.305	16,316.09	29.296	571.817	7.33	1,866,619	11.17
>2000	fail	8,057,583,101	592.647	574.158	13,595.92	24.488	103.33	5.674	359.564	5.28
>5000	all	55,884,459,947	2,601,931	574.158	21,478.07	30.371	610.455	10.121	1,829,668	10.25
>5000	pass	48,495,246,376	2,216,584	228.305	21,878.37	30.967	521.574	10.35	1,555,850	11.10
>5000	fail	7,389,213,571	385.347	574.158	19,175.47	26.663	90.25	8.935	275.395	5.32
>10000	all	50,427,968,932	1,842,785	574.158	27,365.08	33.015	524.298	14.499	1,426,706	10.29
>10000	pass	43,969,252,676	1,587,648	228.305	27,694.58	33.512	451.324	14.654	1,226,993	11.09
>10000	fail	6,458,716,256	255.137	574.158	25,314.69	29.838	73.756	13.639	200.087	5.35
>15000	all	44,818,316,840	1,388,271	574.158	32,283.55	35.881	442.787	18.978	1,123,251	10.33
>15000	pass	39,240,547,891	1,204,615	228.305	32,575.17	36.318	383.544	19.098	973.337	11.08
>15000	fail	5,577,768,949	183.656	574.158	30,370.74	33.044	59.731	18.302	150.042	5.37
>20000	all	39,199,977,469	1,064,919	574.158	36,810.29	38.935	367.618	23.541	884.435	10.35
>20000	pass	34,456,823,388	929.35	228.305	37,076.26	39.304	320.231	23.636	771.042	11.08
>20000	fail	4,743,154,081	135.569	574.158	34,987.01	36.357	47.684	22.964	113.449	5.39
>25000	all	33,684,277,705	818.664	574.158	41,145.42	42.215	299.555	28.117	691.674	10.39
>25000	pass	29,735,390,805	718.564	228.305	41,381.68	42.532	262.472	28.194	606.637	11.08
>25000	fail	3,948,886,900	100.1	574.158	39,449.41	39.927	37.256	27.591	85.067	5.40
>30000	all	28,330,341,591	623.313	574.158	45,451.22	45.703	238.576	32.734	532.916	10.42
>30000	pass	25,123,978,863	550.326	228.305	45,652.9	45.97	210.305	32.795	470.235	11.09
>30000	fail	3,206,362,728	72.987	574.158	43,930.6	43.7	28.367	32.33	62.694	5.41
>40000	all	18,664,535,576	343.911	574.158	54,271.41	53.385	140.455	42.268	298.512	10.48
>40000	pass	16,698,510,892	306.866	228.305	54,416.29	53.574	125.185	42.302	266.266	11.09
>40000	fail	1,966,024,684	37.045	574.158	53,071.25	51.895	15.298	42.014	32.248	5.43
>50000	all	11,279,536,205	178.166	574.158	63,309.13	61.785	75.907	51.899	156.022	10.54
>50000	pass	10,172,642,344	160.437	228.305	63,405.83	61.931	68.321	51.925	140.471	11.11
>50000	fail	1,106,893,861	17.729	574.158	62,434.08	60.553	7.595	51.711	15.553	5.46
>60000	all	6,300,471,247	86.761	574.158	72,618.7	70.655	38.038	61.705	76.404	10.59
>60000	pass	5,726,311,620	78.823	228.305	72,647.72	70.734	34.569	61.718	69.411	11.11
>60000	fail	574,159,627	7.938	574.158	72,330.51	69.853	3.471	61.56	6.994	5.46
>70000	all	3,290,071,639	40.026	574.158	82,198.36	79.903	17.898	71.553	35.377	10.63
>70000	pass	3,006,472,252	36.605	228.305	82,132.83	79.915	16.386	71.56	32.357	11.11
>70000	fail	283,599,387	3.421	574.158	82,899.55	79.718	1.512	71.459	3.02	5.48
>80000	all	1,632,797,254	17.744	574.158	92,019.68	89.26	8.033	81.496	15.722	10.61
>80000	pass	1,494,152,048	16.272	228.305	91,823.5	89.308	7.388	81.515	14.422	11.07
>80000	fail	138,645,206	1.472	574.158	94,188.31	88.86	645	81.28	1.3	5.46
>90000	all	771,931,984	7.536	574.158	102,432.58	99.215	3.431	91.363	6.685	10.58
>90000	pass	708,462,655	6.957	228.305	101,834.5	99.1	3.187	91.355	6.176	11.01
>90000	fail	63,469,329	579	574.158	109,618.87	101.144	245	91.567	510	5.38
>100000	all	361,630,004	3.186	574.158	113,505.96	109.481	1.451	101.511	2.827	10.43
>100000	pass	327,985,641	2.923	228.305	112,208.56	109.259	1.347	101.453	2.598	10.90
>100000	fail	33,644,363	263	574.158	127,925.33	114.897	105	102.206	230	5.29

## Sheet: Table S4
Table S4: Pacbio HiFi ultra-long data statistics
Sample ID	HIFI Reads num	Total Bases(Gb)	HIFI Read length(bp)	HIFI reads length N50(bp)
Kabusa	1,757,702	27.61	15.71	15.999

## Sheet: Table S5
Table S5: Statistics of the Hi-C data
Sample	Raw reads	Raw bases	Clean reads	Clean bases	Q20_rate	Q30_rate
Kabusa	405,199,136	60,779,870,400	395,233,390	58,770,685,195	97.025%	91.838%

## Sheet: Table S6
Table S6: Four assembly strategies evaluated on the quality of the contig-level genomes
Strategy	Method	Haplotype	Genome size (bp)	Contig N50 (bp)	Contig number	QV	BUSCO
1	Hifiasm (HiFi+ONT)	HaplotypeA	491,639,179	18,835,800	196	51.3462	96.1
-		HaplotypeB	491,902,017	17,455,258	123	54.5970	96.3
2	Hifiasm (HiFi)	HaplotypeA	573,598,366	14,584,209	563	48.9147	96.6
-		HaplotypeB	498,650,051	14,142,530	132	55.1604	96.0
3	Hifiasm (HiFi+Hi-C)	HaplotypeA	485,801,108	12,230,695	497	48.3150	94.5
-		HaplotypeB	519,179,346	17,455,137	156	54.6120	96.6
4	Nextdenovo (ONT)	-	500,387,719	8,874,891	100	29.7796	97.3

## Sheet: Table S7
Table S7: Detailed statistical results of each chromosome and its length in the hybrid assembly version (HiFi + Hi-C)
Chrid	Length (bp)	Contig number
chr1A	31,985,532	2
chr1B	32,848,452	2
chr2A	23,826,552	1
chr2B	23,246,537	1
chr3A	21,466,382	1
chr3B	22,916,221	2
chr4A	26,449,744	3
chr4B	22,947,899	4
chr5A	26,596,749	2
chr5B	27,193,646	1
chr6A	17,069,175	1
chr6B	17,455,137	1
chr7A	23,183,884	1
chr7B	24,133,116	1
chr8A	23,323,399	3
chr8B	24,037,150	3
chr9A	21,807,474	2
chr9B	21,848,171	2
chr10A	35,038,824	3
chr10B	34,420,799	8
chr11A	19,751,762	3
chr11B	20,850,256	2
chr12A	21,522,517	2
chr12B	21,289,554	3
chr13A	29,322,119	6
chr13B	25,680,255	6
chr14A	20,301,842	3
chr14B	20,396,745	1
chr15A	24,807,460	3
chr15B	25,376,887	1
chr16A	23,794,740	2
chr16B	23,019,940	2
chr17A	20,905,627	1
chr17B	21,262,355	1
chr18A	27,231,177	4
chr18B	26,968,406	2
chr19A	25,902,064	2
chr19B	25,525,100	2
chr20A	14,915,663	2
chr20B	18,095,468	2
chrUnn	1,194,878	10

## Sheet: Table S8
Table S8: Position of telomeric repeat sequences along the chromosomes in the 'Kabusa' genome
Chrid	Number of telomere motif repeats in the upstream of the chromosome	Number of telomere motif repeats in the downstream of the chromosome	Starting position of the telomere in the upstream of the chromosome (bp)	Termination position of the telomere in the upstream of the chromosome (bp)	Starting position of the telomere in the downstream of the chromosome (bp)	Termination position of the telomere in the downstream of the chromosome (bp)
chr1A	629	508	1	5117	31,987,743	31,994,519
chr2A	532	740	1	18.095	23,814,264	23,828,568
chr3A	586	859	1	4589	21,462,739	21,470,070
chr4A	470	884	1	13.747	26,440,322	26,452,622
chr5A	468	695	1	11.204	26,569,401	26,588,642
chr6A	505	1043	1	16.472	17,072,020	17,091,746
chr7A	766	902	1	17.766	23,169,168	23,189,029
chr8A	457	953	1	13.895	23,318,483	23,328,107
chr9A	472	562	1	18.066	21,790,743	21,798,437
chr10A	534	912	1	18.462	35,022,194	35,041,440
chr11A	416	1028	1	16.684	19,738,170	19,757,695
chr12A	710	730	1	17.631	21,524,801	21,531,472
chr13A	547	563	1	4101	29,294,730	29,314,101
chr14A	641	1088	1	10.882	20,294,524	20,307,342
chr15A	428	971	1	16.394	24,795,042	24,814,259
chr16A	859	857	1	13.471	23,793,695	23,807,737
chr17A	560	770	1	18.111	20,892,567	20,908,021
chr18A	554	843	1	17.622	27,224,893	27,238,183
chr19A	719	659	1	17.425	25,722,503	25,739,298
chr20A	509	1212	1	18.527	14,904,971	14,923,952
chr1B	672	611	1	6049	32,836,099	32,855,847
chr2B	622	667	1	18.402	23,233,746	23,247,559
chr3B	454	826	1	3636	22,919,120	22,925,975
chr4B	682	672	1	17.521	22,942,128	22,952,712
chr5B	680	710	1	12.237	27,177,284	27,196,641
chr6B	1069	983	1	17.234	17,442,044	17,461,370
chr7B	720	771	1	17.481	24,117,381	24,135,723
chr8B	499	686	1	7117	24,030,681	24,039,800
chr9B	476	451	1	18.316	21,843,848	21,850,982
chr10B	496	890	1	18.034	34,417,608	34,431,587
chr11B	634	619	1	18.793	20,837,120	20,854,630
chr12B	557	627	1	16.114	21,269,345	21,280,174
chr13B	565	1011	1	12.937	25,683,260	25,697,895
chr14B	950	551	1	13.223	20,390,624	20,399,318
chr15B	400	491	1	16.202	25,361,670	25,377,015
chr16B	496	808	1	12.881	23,031,496	23,038,068
chr17B	577	991	1	18.152	21,258,800	21,266,254
chr18B	654	749	1	16.785	26,962,000	26,974,122
chr19B	730	865	1	17.581	25,508,125	25,526,529
chr20B	679	1110	1	5535	18,092,788	18,111,058

## Sheet: Table S9
Table S9: Gap filling in the genome assembly
Chrid	Start (bp)	End (bp)	Confidence
chr11A	13,733,830	13,743,466	True
chr4A	16,364,170	16,369,141	True
chr1A	21,262,358	21,278,987	True
chr8A	9,646,381	9,658,112	True
chr8A	14,485,964	14,496,370	True
chr9A	11,881,180	11,892,320	True
chr10A	8,586,083	8,591,114	True
chr11A	4,319,862	4,331,532	True
chr10A	18,352,114	18,361,413	True
chr14A	7,616,432	7,623,781	True
chr13A	12,226,396	12,241,564	True
chr14A	8,572,236	8,583,192	True
chr12A	9,991,358	10,007,492	True
chr13A	17,016,739	17,024,637	True
chr13A	26,887,097	26,892,850	True
chr13A	27,208,601	27,216,028	True
chr5A	4,753,880	4,761,854	True
chr16A	12,259,201	12,267,506	True
chr18A	11,151,262	11,161,002	True
chr15A	10,734,136	10,745,923	True
chr15A	13,576,189	13,588,137	True
chr20A	679,886	693,515	True
chr13A	25,322,309	25,331,157	True
chr18A	260,658	273,239	True
chr18A	12,702,800	12,711,574	True
chr19A	1,129,929	1,150,205	True
chr1B	21,228,090	21,243,005	True
chr4B	798,614	808,582	True
chr20B	3,661,701	3,681,636	True
chr11B	7,994,758	8,006,072	True
chr4B	11,689,036	11,699,915	True
chr10B	22,647,361	22,662,322	True
chr10B	8,193,288	8,201,138	True
chr10B	23,142,513	23,156,098	True
chr8B	9,683,182	9,691,766	True
chr12B	19,410,340	19,423,157	True
chr8B	10,205,031	10,216,411	True
chr9B	11,824,820	11,836,466	True
chr13B	1,658,160	1,677,722	True
chr13B	11,854,381	11,868,507	True
chr13B	864,578	869,935	True
chr10B	17,837,245	17,845,148	True
chr12B	20,425,042	20,427,316	True
chr3B	19,636,891	19,653,367	True
chr10B	8,419,256	8,425,725	True
chr10B	15,230,702	15,239,139	True
chr19B	1,181,686	1,188,184	True
chr10B	18,386,032	18,391,000	True
chr16B	22,177,163	22,211,453	True
chr13B	23,275,740	23,284,998	True
chr18B	12,456,933	12,479,897	True

## Sheet: Table S10
Table S10: Detailed statistical results of each chromosome and its length in the final T2T 'Kabusa' genome assembly
Chrid	Length (bp)	Contig number
chr1A	31,994,519	1
chr2A	23,828,568	1
chr3A	21,470,070	1
chr4A	26,452,622	2
chr5A	26,588,642	1
chr6A	17,091,746	1
chr7A	23,189,029	1
chr8A	23,328,107	1
chr9A	21,798,437	1
chr10A	35,041,440	1
chr11A	19,757,695	1
chr12A	21,531,472	1
chr13A	29,314,101	1
chr14A	20,307,342	1
chr15A	24,814,259	1
chr16A	23,807,737	1
chr17A	20,908,021	1
chr18A	27,238,183	1
chr19A	25,739,298	1
chr20A	14,923,952	1
chr1B	32,855,847	1
chr2B	23,247,559	1
chr3B	22,925,975	1
chr4B	22,952,712	2
chr5B	27,196,641	1
chr6B	17,461,370	1
chr7B	24,135,723	1
chr8B	24,039,800	1
chr9B	21,850,982	1
chr10B	34,431,587	1
chr11B	20,854,630	1
chr12B	21,280,174	1
chr13B	25,697,895	2
chr14B	20,399,318	1
chr15B	25,377,015	1
chr16B	23,038,068	1
chr17B	21,266,254	1
chr18B	26,974,122	1
chr19B	25,526,529	1
chr20B	18,111,058	1
chrUnn	1,194,878	10

[truncated: 16 more sheets: Table S11, Table S12, Table S13, Table S14, Table S15, Table S16, Table S17, Table S18, Table S19, Table S20, Table S21, Table S22, Table S23, Table S24, Table S25, Table S26]
